# Supplementary material for: SET8 methyltransferase activity during the DNA double-strand break response is required for recruitment of 53BP1
Source: PubMed Central journal article supplement — EMBO Rep. 2014 Sep 25;15(11):1163–74. doi: 10.15252/embr.201439434 (PMC4253490; doi:10.15252/embr.201439434), 2014-09-25
Supplement: embr0015-1163-sd1.pdf [file embr0015-1163-sd1.pdf]

# Supplementary Figure 1

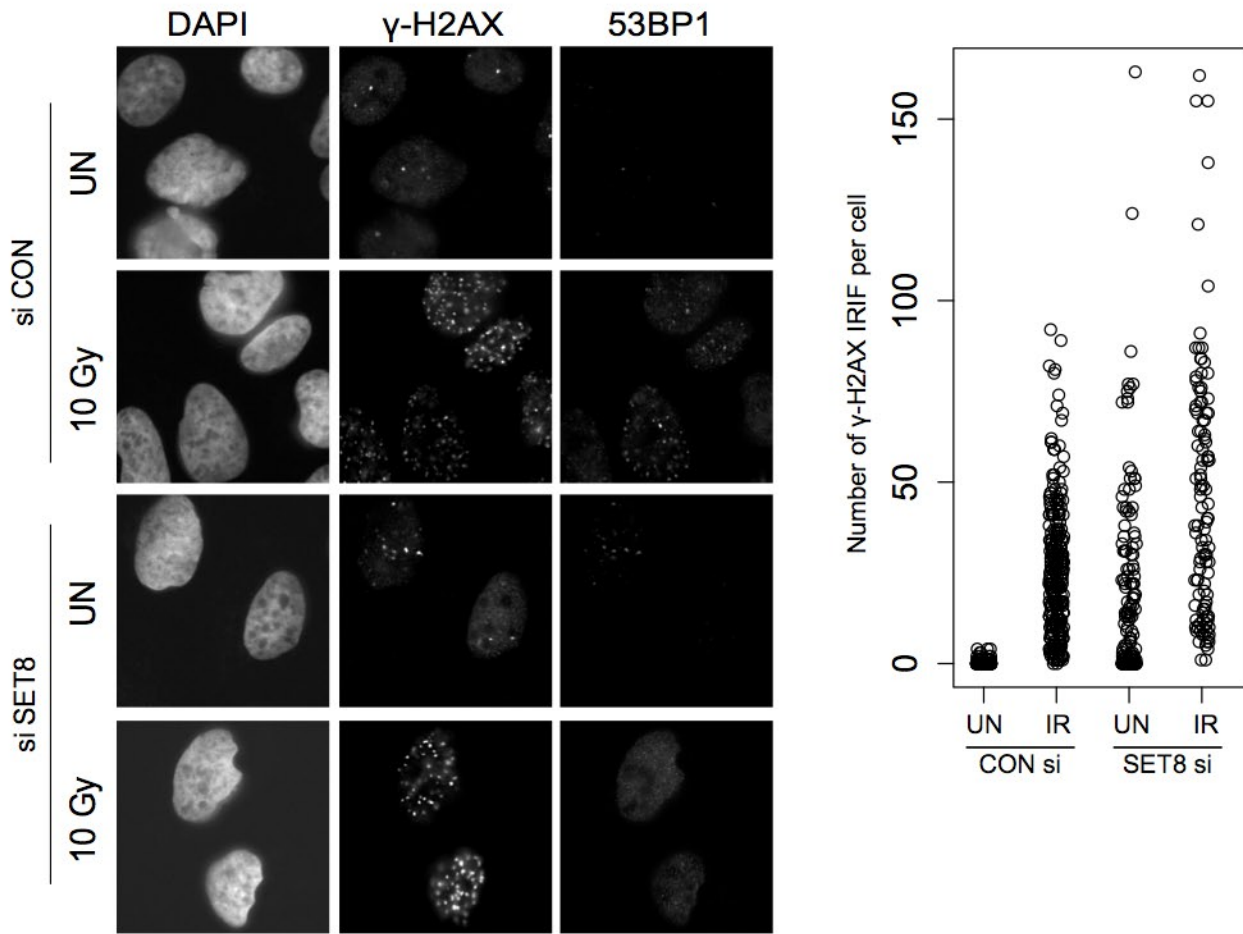

**Supplementary Figure 1 |  $\gamma$ -H2AX formation in siSET8 depleted cells.** U2OS cells were treated with siSET8 siRNA for two times over a 48 hour period and cells were treated with 10 Gy IR and immediately processed for immunostaining. Foci were quantified with Cell Profiler
